# Supplementary material for: Molecular Mechanisms of the Stripe Rust Interaction with Resistant and Susceptible Wheat Genotypes
Source: MDPI journal article supplement (doi:10.3390/ijms25052930), 2024-03-02
Supplement: s1 [file s1]

Supplementary Table S1. Information of mapping statistics for all the transcriptome reads to *Pst*-78 reference genome.

|                            | <b>Resistant bulk (count)</b> | <b>Susceptible bulk (count)</b> | <b>Resistant (%)</b> | <b>Susceptible (%)</b> |
|----------------------------|-------------------------------|---------------------------------|----------------------|------------------------|
| <b>Counted fragments</b>   | 370,937                       | 352,479                         | 10.18                | 11.91                  |
| <b>Unique fragments</b>    | 342,405                       | 329,772                         | 9.40                 | 11.15                  |
| <b>Common fragments</b>    | 28,532                        | 22,707                          | 0.78                 | 0.77                   |
| <b>Uncounted fragments</b> | 3,271,563                     | 2,606,435                       | 89.82                | 88.09                  |
| <b>Total fragments</b>     | 3,642,500                     | 2,958,914                       | 100                  | 100                    |

Note: Counted fragments represent reads that mapped to reference *Pst* genome, unique fragments mapped to single position on the genome, while non-specific (aligned to a few regions) had between 1-5 hits, uncounted fragments didn't have any hits in the reference *Pst* genome.
